# Supplementary material for: High angular resolution diffusion-weighted imaging in mild traumatic brain injury
Source: PubMed Central journal article supplement — Neuroimage Clin. 2016 Nov 17;13:174–80. doi: 10.1016/j.nicl.2016.11.016 (PMC5144744; doi:10.1016/j.nicl.2016.11.016), 2016-11-17
Supplement: mmc1.pdf [file mmc1.pdf]

Supplementary Table 1: Global fractional anisotropy (FA) values measured with the three different methods in acute or sub-acute mild traumatic brain injury (mTBI defined as GCS  $\geq$  13, GCS  $\geq$  13 and post traumatic amnesia (PTA)  $\leq$  24 h, GCS  $\geq$  13 and PTA  $>$  24 h) vs controls. Age was used as covariate.

| Study group                            | FA skeleton, single-fiber only |                      | FA skeleton       |                      | FA tractogram     |                      |
|----------------------------------------|--------------------------------|----------------------|-------------------|----------------------|-------------------|----------------------|
|                                        | mean $\pm$ SD                  | F-value<br>(P-value) | mean $\pm$ SD     | F-value<br>(P-value) | mean $\pm$ SD     | F-value<br>(P-value) |
| All mTBI (GCS $\geq$ 13)               | 0.576 $\pm$ 0.042              | 13.427               | 0.412 $\pm$ 0.025 | 6.868                | 0.521 $\pm$ 0.047 | 9.132                |
| Controls                               | 0.591 $\pm$ 0.034              | 0.0003               | 0.419 $\pm$ 0.021 | 0.010                | 0.534 $\pm$ 0.043 | 0.003                |
| mTBI (GCS $\geq$ 13 & PTA $\leq$ 24 h) | 0.582 $\pm$ 0.040              | 10.968               | 0.416 $\pm$ 0.022 | 5.135                | 0.527 $\pm$ 0.048 | 6.868                |
| Controls                               | 0.591 $\pm$ 0.034              | 0.001                | 0.419 $\pm$ 0.021 | 0.025                | 0.534 $\pm$ 0.043 | 0.010                |
| mTBI (GCS $\geq$ 13 & PTA $>$ 24 h)    | 0.556 $\pm$ 0.042              | 11.934               | 0.399 $\pm$ 0.030 | 7.224                | 0.501 $\pm$ 0.040 | 8.371                |
| Controls                               | 0.591 $\pm$ 0.034              | 0.001                | 0.419 $\pm$ 0.021 | 0.010                | 0.534 $\pm$ 0.043 | 0.006                |
