# Supplementary material for: High angular resolution diffusion-weighted imaging in mild traumatic brain injury
Source: PubMed Central journal article supplement — Neuroimage Clin. 2016 Nov 17;13:174–80. doi: 10.1016/j.nicl.2016.11.016 (PMC5144744; doi:10.1016/j.nicl.2016.11.016), 2016-11-17
Supplement: mmc2.pdf [file mmc2.pdf]

Supplementary Table 2: Global mean (MD), axial (AD) and radial (RD) diffusivity values measured with the single-fiber skeleton approach in acute or sub-acute mild traumatic brain injury (mTBI defined as GCS  $\geq$  13, GCS  $\geq$  13 and post traumatic amnesia (PTA)  $\leq$  24 h, GCS  $\geq$  13 and PTA > 24 h) vs controls. Age was used as covariate.

| Study group                            | MD                                       |                      | AD                                       |                      | RD                                       |                      |
|----------------------------------------|------------------------------------------|----------------------|------------------------------------------|----------------------|------------------------------------------|----------------------|
|                                        | $(\times 10^{-3} \text{ mm}^2/\text{s})$ |                      | $(\times 10^{-3} \text{ mm}^2/\text{s})$ |                      | $(\times 10^{-3} \text{ mm}^2/\text{s})$ |                      |
|                                        | mean $\pm$ SD                            | F-value<br>(P-value) | mean $\pm$ SD                            | F-value<br>(P-value) | mean $\pm$ SD                            | F-value<br>(P-value) |
| All mTBI (GCS $\geq$ 13)               | 0.783 $\pm$ 0.073                        | 4.950                | 1.389 $\pm$ 0.081                        | 3.087                | 0.560 $\pm$ 0.105                        | 9.594                |
| Controls                               | 0.765 $\pm$ 0.058                        | 0.028                | 1.368 $\pm$ 0.073                        | 0.081                | 0.525 $\pm$ 0.085                        | 0.002                |
| mTBI (GCS $\geq$ 13 & PTA $\leq$ 24 h) | 0.775 $\pm$ 0.073                        | 3.748                | 1.383 $\pm$ 0.083                        | 2.264                | 0.546 $\pm$ 0.103                        | 7.626                |
| Controls                               | 0.765 $\pm$ 0.058                        | 0.056                | 1.368 $\pm$ 0.073                        | 0.135                | 0.525 $\pm$ 0.085                        | 0.007                |
| mTBI (GCS $\geq$ 13 & PTA > 24 h)      | 0.809 $\pm$ 0.066                        | 5.659                | 1.411 $\pm$ 0.074                        | 3.287                | 0.604 $\pm$ 0.103                        | 9.438                |
| Controls                               | 0.765 $\pm$ 0.058                        | 0.021                | 1.368 $\pm$ 0.073                        | 0.076                | 0.525 $\pm$ 0.085                        | 0.003                |
